# Supplementary material
Source: HighWire-hosted journal article supplement (https://ebmtp.com/highwire/filestream/136142/field_highwire_adjunct_files/0/tarumi_85_1922.pdf)
Supplement: tarumi_85_1922.pdf [file tarumi_85_1922.pdf]

# 遗忘型轻度认知障碍患者的淀粉样蛋白沉积和睡眠血压的关系

Takashi Tarumi, PhD; Thomas S. Harris, MSBME; Candace Hill, RN, BSN; Zohre German, MS;  
Jonathan Riley, BA; Marcel Turner, MS; Kyle B. Womack, MD; Diana R. Kerwin, MD;  
Nancy L. Monson, PhD; Ann M. Stowe, PhD; Dana Mathews, MD, PhD;  
C. Munro Cullum, PhD; Rong Zhang, PhD

**目的：**研究旨在确定遗忘型轻度认知障碍 (amnesic mild cognitive impairment, aMCI) 患者皮质区  $\beta$  淀粉样蛋白 ( $A\beta$ ) 沉积是否与生理性血压 (blood pressure, BP) 和动态脑血流 (cerebral blood flow, CBF) 节律有关。

**方法：**本研究共纳入 40 例 aMCI 患者。采用  $^{18}F$ -florbetapir PET 评估皮层中  $A\beta$  的沉积，并以相对于小脑的标准摄入比值 (standardized uptake value ratio, SUVR) 表示。采用 24 小时动态监测仪评估觉醒和睡眠期的生理性 BP。计算睡眠 BP 的勺型状态 (即从觉醒 BP 改变的百分数)，并将患者分为勺型 ( $\geq 10\%$ ) 和非勺型 ( $< 10\%$ ) 两组。对在反复坐-站动作中测量的大脑中动脉 BP 节律改变和 CBF 流速进行传递函数分析，以评估动态 CBF 的节律。

**结果：**年龄与后扣带回皮质、楔前叶和皮质区的大量的  $A\beta$  沉积呈正相关。由于年龄效应，睡眠收缩期 BP 下降程度的衰减与后扣带回皮质 SUVR 的高水平程度有关。相一致的是，非勺型组在后扣带回皮质的 SUVR 高于勺型组。非勺型组中 BP 与 CBF 速率变化间的传递函数增加量减弱，这些增加量较少的个体在后扣带回皮质的 SUVR 更高。

**结论：**对于 aMCI 患者，睡眠 BP 下降减弱与后扣带回皮质  $A\beta$  的大量沉积和动态 CBF 节律改变相关。 *Neurology*<sup>®</sup> 2015;85:1922–1929
